# Supplementary material for: Multimodal Imaging of Metals in a Retinal Degeneration Model to Inform on Ocular Disease
Source: MDPI journal article supplement (doi:10.3390/analytica4030021), 2023-07-01
Supplement: s1 [file s1]

Archive with 1 entries (1 files):
- analytica-2455075-supplementary.pdf
