# Supplementary figures and images for: Multimodal Imaging of Metals in a Retinal Degeneration Model to Inform on Ocular Disease
Source: MDPI journal article supplement (doi:10.3390/analytica4030021), 2023-07-01

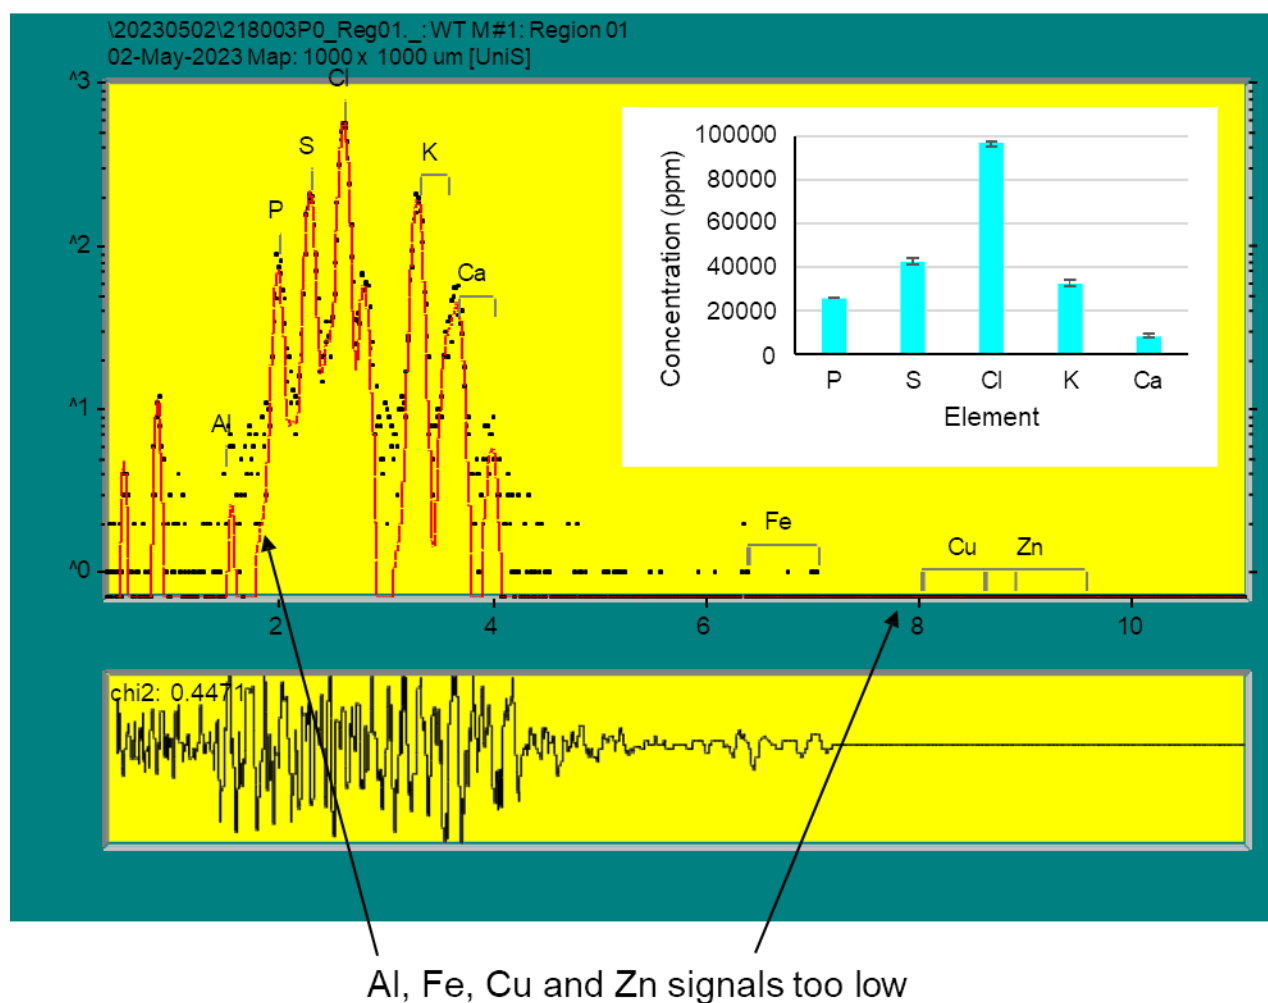

Figure S1 PIXE Spectrum showing insufficient sensitivity for quantification of Al, Fe, Cu, and Zn

Supplement: s1 [file s1 › analytica-2455075-supplementary.pdf]
